# Supplementary material
Source: PubMed Central journal article supplement (PMC4176755)
Supplement: NIHMS35772-supplement-01.pdf [file NIHMS35772-supplement-01.pdf]

### Figure legends

**Figure S1.** Days to positive signal in MB/BacTec liquid medium are inversely related to colony forming units / ml (CFU/ml) of *M. tuberculosis* H37Rv.

**Figure S2.** Days to positive signal in MB/BacTec liquid medium by allocation.

**Figure S3.** Time to sputum smear conversion by allocation. Error bars, 95% confidence intervals. The number of participants with positive sputum smear remaining in follow-up (number at risk) at 0, 2, 4, 6 and 8 weeks is presented [11].

**Table S1. Reasons for ineligibility among individuals assessed for eligibility to participate in the trial (n=214)**

| <b>Reason for ineligibility</b>                               | <b>Number ineligible</b> |
|---------------------------------------------------------------|--------------------------|
| Diagnosis other than PTB                                      | 13                       |
| Sample other than sputum AFB positive                         | 23                       |
| Age < 18 years                                                | 18                       |
| Known sarcoidosis                                             | 1                        |
| Known nephrolithiasis                                         | 8                        |
| Known HIV infection                                           | 18                       |
| Known malignancy                                              | 8                        |
| Known renal failure, or serum creatinine > 250 micromol/L     | 3                        |
| Known hepatic failure                                         | 0                        |
| Oral corticosteroid therapy in preceding month                | 12                       |
| Cytotoxic or other immunosuppressant in preceding month       | 1                        |
| > 7 days antituberculous therapy in 6 months before enrolment | 32                       |
| Taking antituberculous therapy other than HRZE at enrolment   | 10                       |
| Molecular testing of MTB revealed rpoB mutation               | 0                        |
| Serum corrected calcium > 2.65 mmol/L                         | 3                        |
| AST / ALT > 120 IU/L or total serum bilirubin > 40 micromol/L | 8                        |
| Pregnant / breastfeeding                                      | 11                       |
| Combination of >1 of the above                                | 45                       |
| <b>Total</b>                                                  | <b>214</b>               |

Martineau *et al*, Figure S1

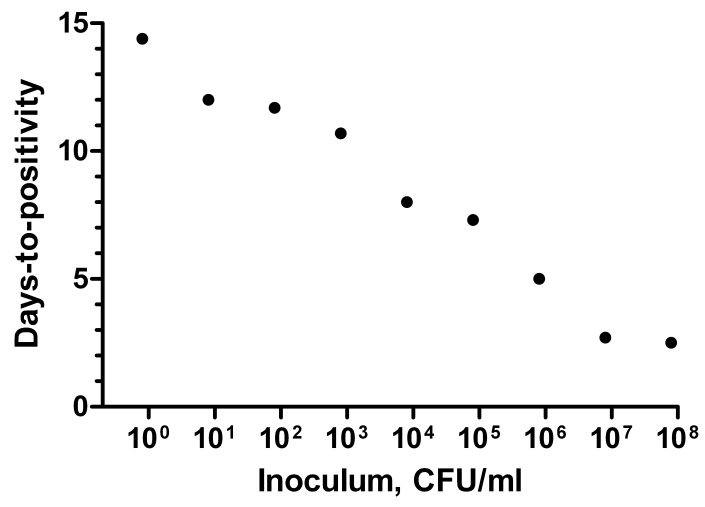

Martineau *et al*, Figure S2

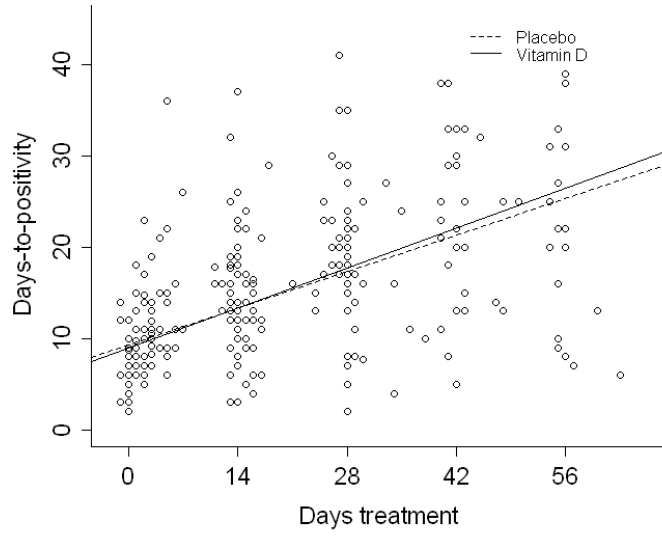

Martineau *et al*, Fig S3

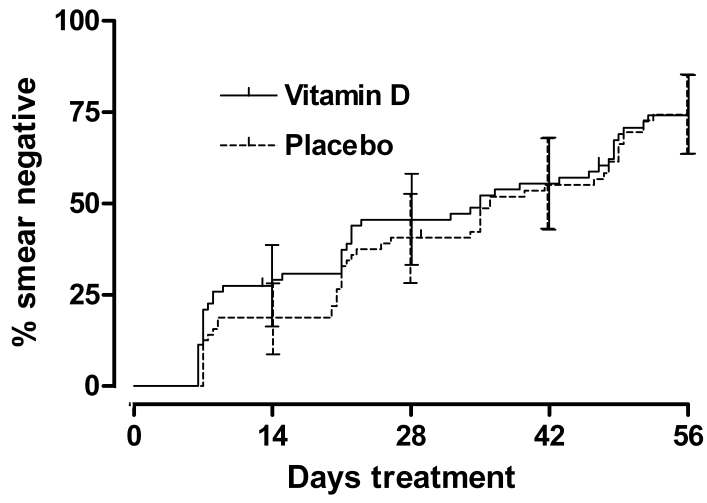

Number at risk

|           |    |    |    |    |    |
|-----------|----|----|----|----|----|
| Vitamin D | 62 | 44 | 33 | 27 | 15 |
| Placebo   | 64 | 52 | 38 | 28 | 16 |
